# Supplementary material
Source: PubMed Central journal article supplement (PMC6533795)

## Rapid Kill Assessment of an *N*-arylated NH125 Analogue against Drug-Resistant Microorganisms

Yasmeen Abouelhassan, Peilan Zhang, Yousong Ding, Robert W. Huigens III\*

Department of Medicinal Chemistry, Center for Natural Products, Drug Discovery and Development (CNPD3), College of Pharmacy, University of Florida, Gainesville, Florida 32610, United States.

\*Corresponding Author: [rhuigens@cop.ufl.edu](mailto:rhuigens@cop.ufl.edu)

# Supporting Information

Cytotoxicity assessment of *N*-arylated analogue 1, NH125 and BAC-16 against HEK 293 cells in a 48-hour MTT assay.

### Dose-Response Curves:

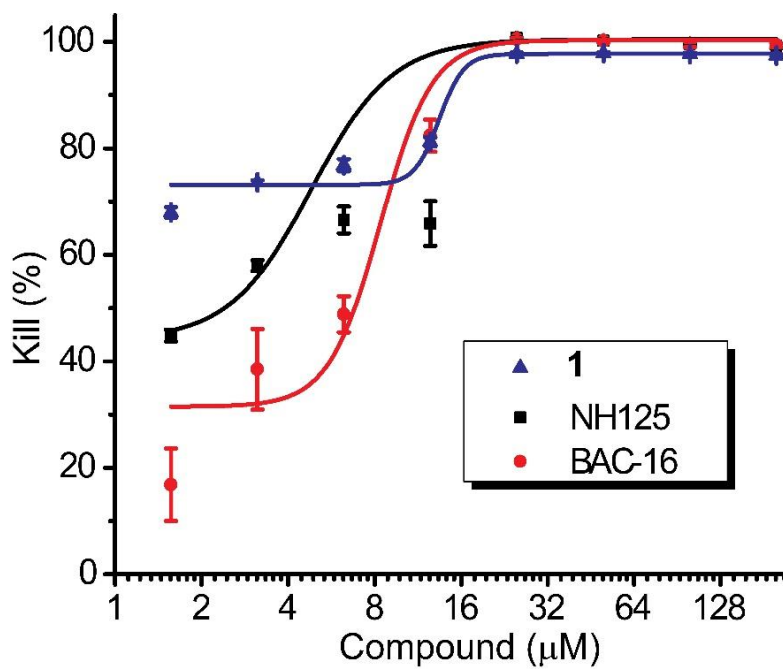

### Structure Key:

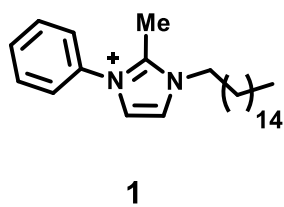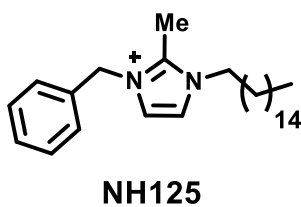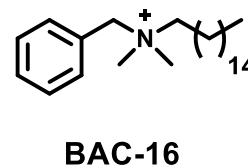

Supplement: MD-010-C8MD00613J-s001.pdf [file MD-010-C8MD00613J-s001.pdf]
